# Supplementary material
Source: Springer Nature journal article supplement (https://www.springermedizin.de/resource/supplementary/13014_2012_805_MOESM3_ESM.pdf/9634780)

**(a)**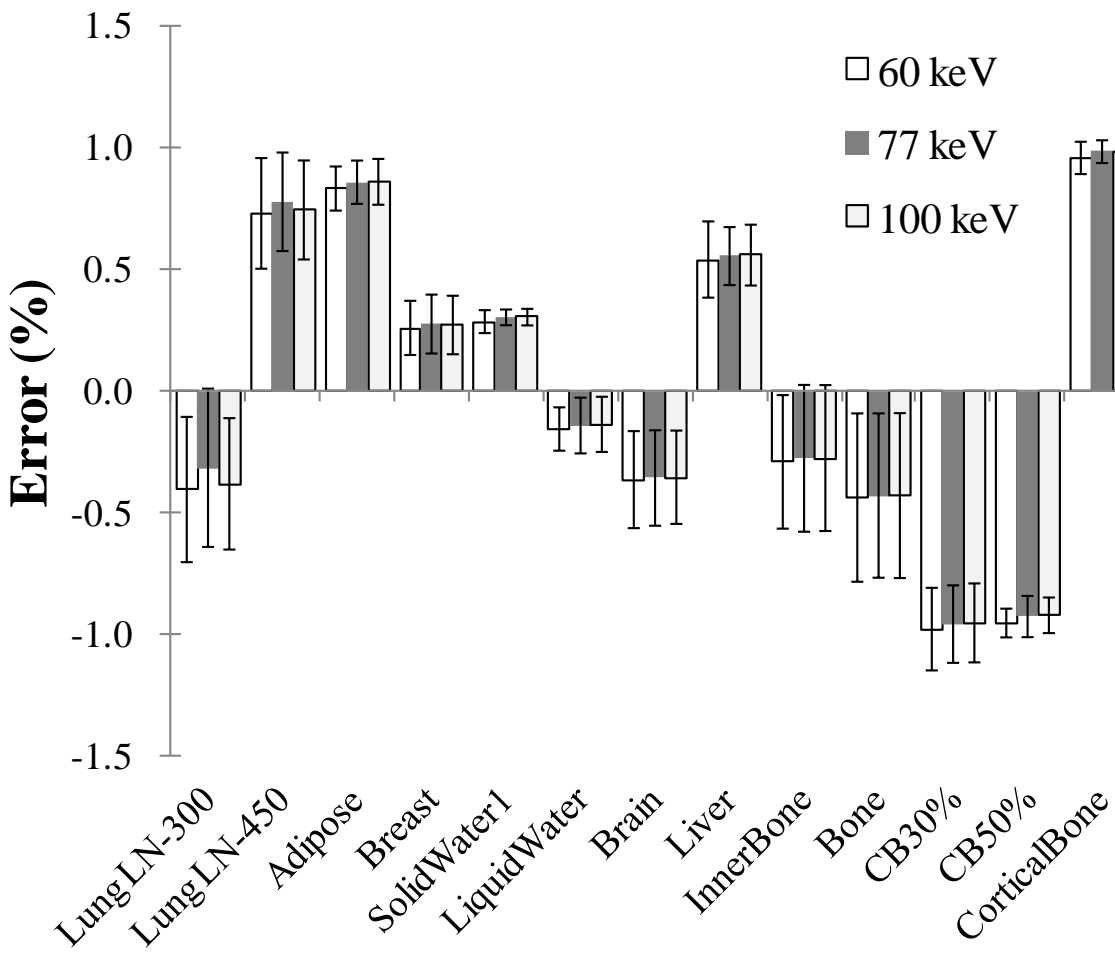**(b)**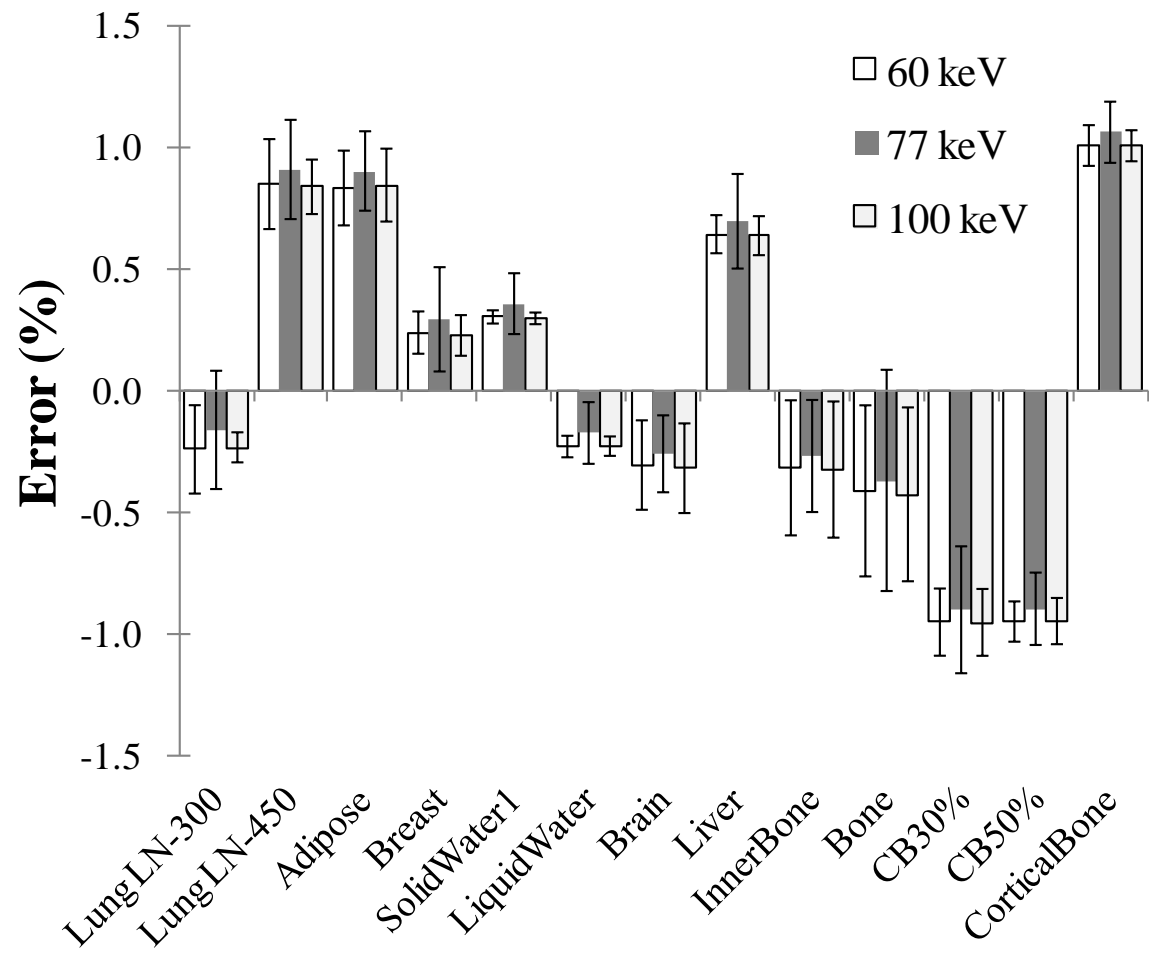

Supplement: MOESM3 [file 9634780]
